# Supplementary material for: Mesoporous Pt@PtM (M = Co, Ni) cage-bell nanostructures toward methanol electro-oxidation
Source: Royal Society of Chemistry journal article supplement (doi:10.1039/d0na00020e), 2020-01-01
Supplement: d0na00020e1.pdf [file d0na00020e1.pdf]

**Electronic Supplementary Information for**

**Mesoporous Pt@PtM (M = Co, Ni) cage-bell nanostructure toward methanol  
electro-oxidation**

Shuli Yin, Ziqiang Wang,\* Chunjie Li, Hongjie Yu, Kai Deng, You Xu, Xiaonian Li,

Liang Wang\* and Hongjing Wang\*

State Key Laboratory Breeding Base of Green-Chemical Synthesis Technology, College of  
Chemical Engineering, Zhejiang University of Technology, Hangzhou 310014, P. R. China.

Corresponding authors' E-mails: zqwang@zjut.edu.cn; wangliang@zjut.edu.cn; hjw@zjut.edu.cn

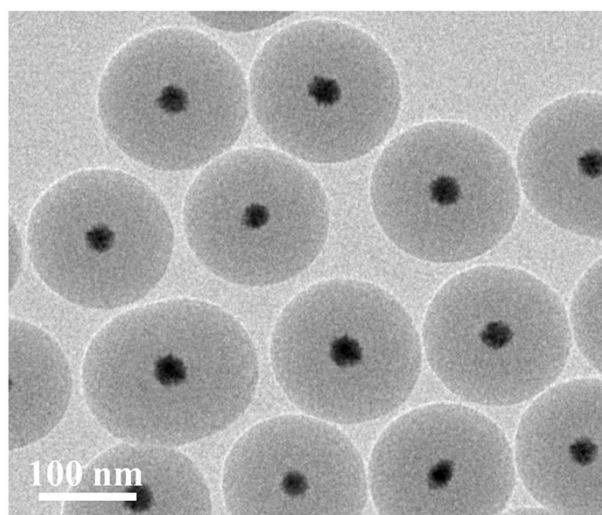

**Fig. S1** TEM image of Pt@SiO<sub>2</sub> nanoparticles.

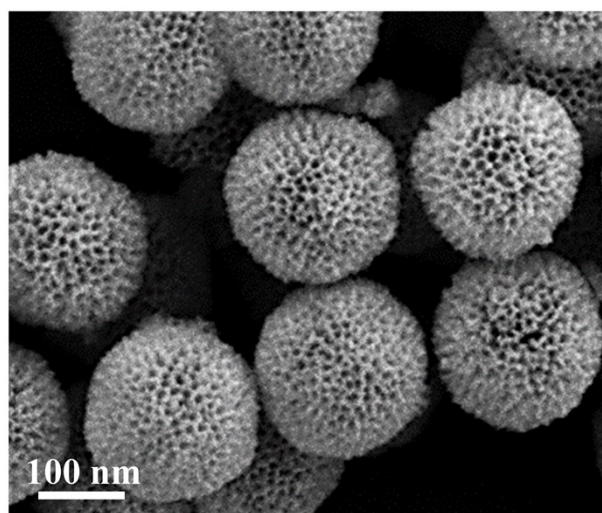

**Fig. S2** TEM image of Pt@SiO<sub>2</sub>@mPtCo nanoparticles.

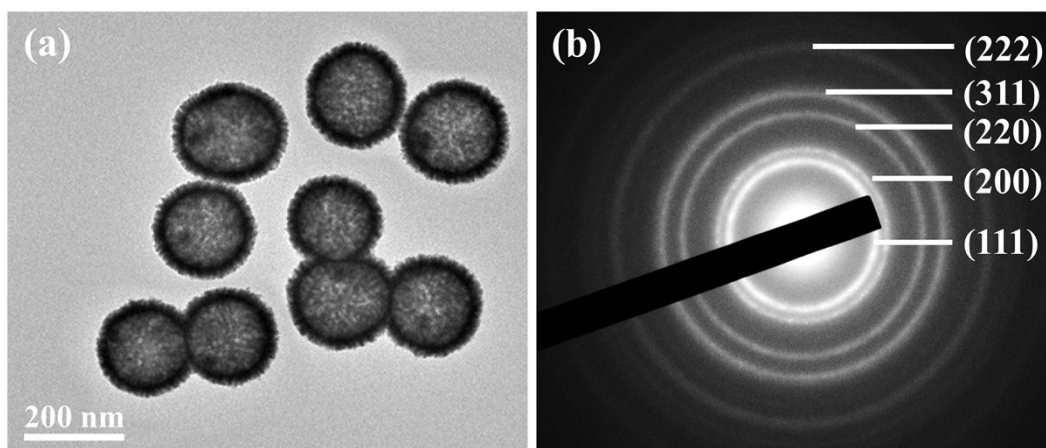

**Fig. S3** (a) TEM image and (b) SAED pattern of the Pt@mPtCo CBs.

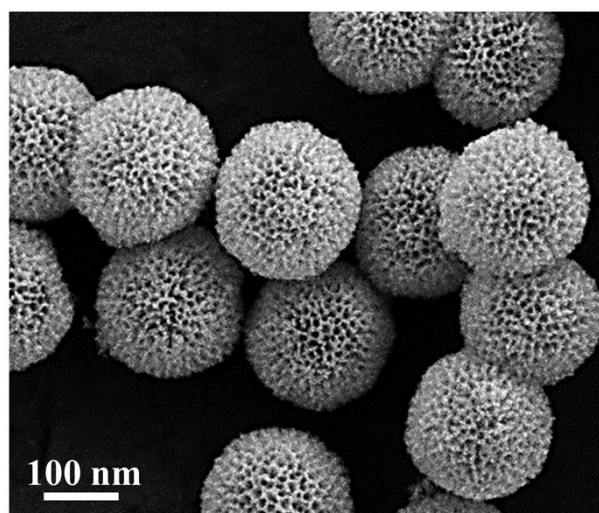

**Fig. S4** SEM image of the mPtCo NCs.

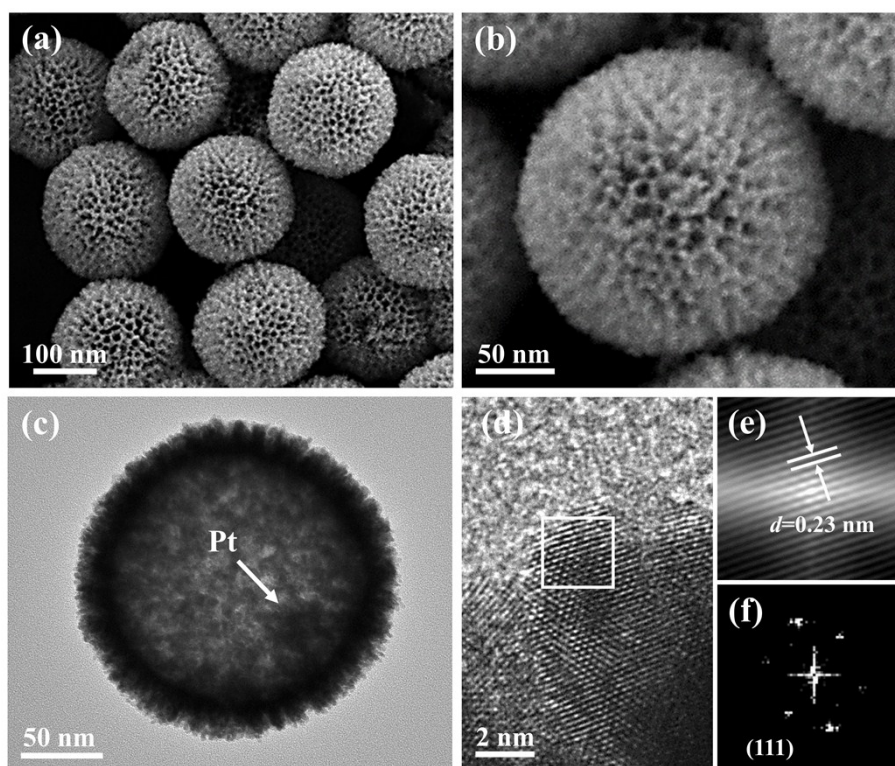

**Fig. S5** (a, b) SEM images of Pt@mPtNi CBs. (c) TEM image of a single Pt@mPtNi CB. (d) HRTEM image of the Pt@mPtNi CBs. (e) Fourier-filtered lattice fringe image and (f) the corresponding FFT pattern.

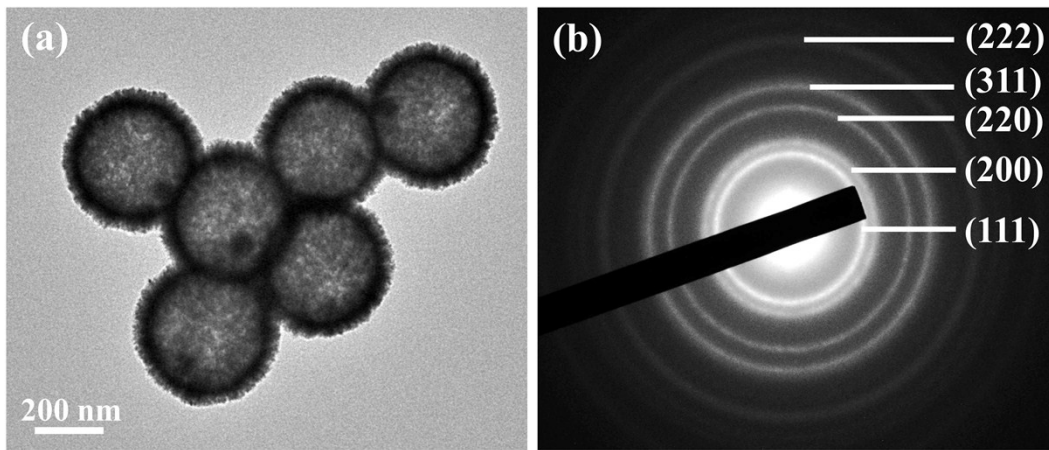

**Fig. S6** (a) TEM image and (b) corresponding SAED pattern of the Pt@mPtNi CBs.

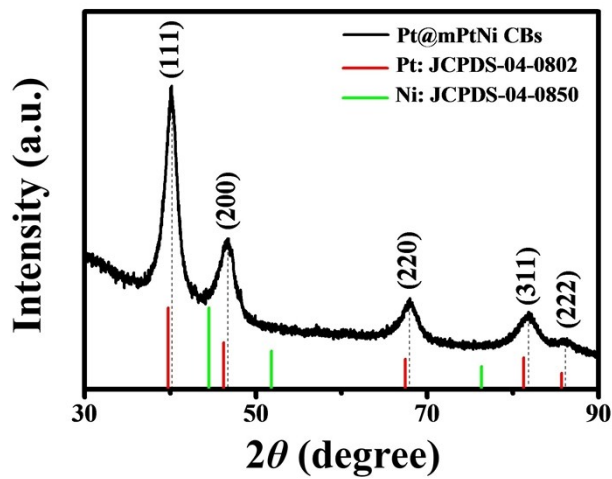

**Fig. S7** XRD pattern of Pt@mPtNi CBs.

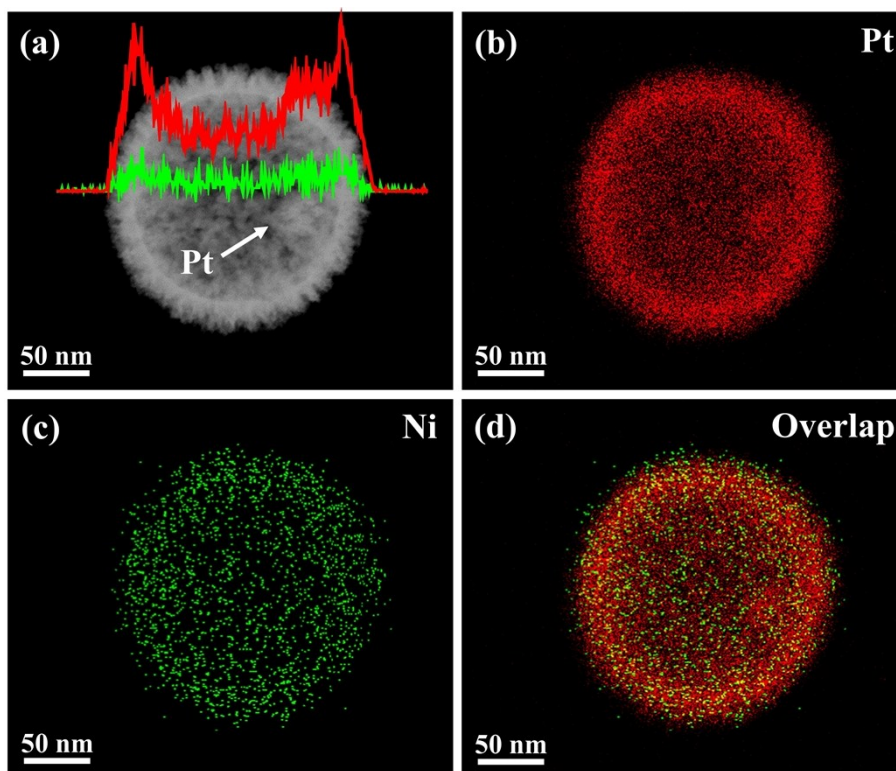

**Fig. S8** (a) HAADF-STEM image and compositional line profiles, and (b-d) EDS elemental mapping images of a single Pt@mPtNi CB.

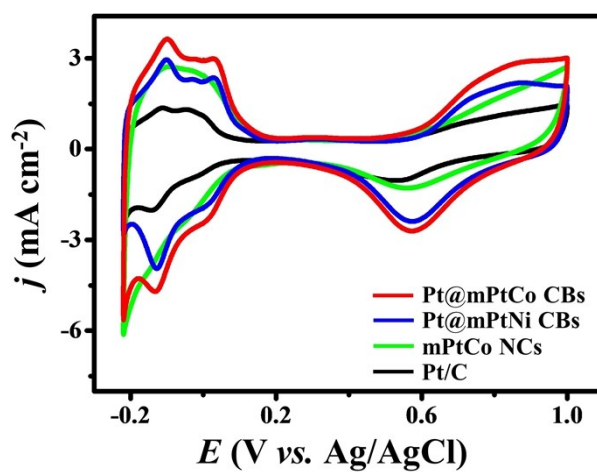

**Fig. S9** CVs of different catalysts measured in 0.5 M H<sub>2</sub>SO<sub>4</sub> at a scan rate of 50 mV s<sup>-1</sup>.

**Table S1** The performance comparisons of MOR on various Pt-based electrocatalysts.

| <b>Catalyst</b>                            | <b>Specific activity<br/>(mA cm<sup>-2</sup>)</b> | <b>Mass activity<br/>( mA μg<sup>-1</sup>Pt )</b> | <b>Ref.</b>      |
|--------------------------------------------|---------------------------------------------------|---------------------------------------------------|------------------|
| <b>Pt@mPtCo CBs</b>                        | <b>1.84</b>                                       | <b>0.58</b>                                       | <b>This work</b> |
| <b>Pt@mPtNi CBs</b>                        | <b>1.58</b>                                       | <b>0.45</b>                                       | <b>This work</b> |
| Dendritic Au@Pd@Pt nanoparticles           | 1.02                                              | 0.43                                              | 1                |
| Pt nanostructured wire arrays              | /                                                 | 0.45                                              | 2                |
| Au-Pt nanodendrites                        | 1.28                                              | 0.45                                              | 3                |
| PtRh nanosponges                           | 1.28                                              | 0.2991                                            | 4                |
| Hollow Pd@Pt nanoparticles                 | /                                                 | 0.50                                              | 5                |
| Pt <sub>1</sub> Ru <sub>3</sub> nanosponge | /                                                 | 0.41                                              | 6                |

## Refereneces

- 1 L. Wang and Y. Yamauchi, *Chem. Mater.*, 2011, **23**, 2457–2465.
- 2 C. Liu, Z. Li, P. Yu, H. Wong and Z. Gu, *ACS Appl. Energy Mater.*, 2018, **1**, 3973–3983.
- 3 Y. Li, W. Ding, M. Li, H. Xia, D. Wang and X. Tao, *J. Mater. Chem. A*, 2015, **3**, 368–376.
- 4 Q. Lu, J. Huang, C. Han, L. Sun and X. Yang, *Electrochim. Acta*, 2018, **266**, 305–311.
- 5 S. Lai, C. Fu, Y. Chen, X. Yu, X. Lai, C. Ye and J. Hu, *J. Power Sources*, 2015, **274**, 604–610.
- 6 M. Xiao, L. Feng, J. Zhu, C. Liu and W. Xing, *Nanoscale*, 2015, **7**, 9467–9471.
